# Supplementary material for: The role of aromatic interactions in the structure and energetics of benzyl ketones
Source: Royal Society of Chemistry journal article supplement (doi:10.1039/c003941a), 2010-01-01
Supplement: c003941a.pdf [file c003941a.pdf]

*The role of Aromatic Interactions in the Structure and Energetics of  
Benzyl Ketones*

**(Supplementary Information)**

Carlos F.R.A.C. Lima,<sup>a</sup> Carlos A.D. Sousa,<sup>a</sup> José E. Rodriguez-Borges,<sup>a</sup> André Melo,<sup>b</sup> Lúcia R. Gomes,<sup>b,c</sup>  
John N. Low<sup>d</sup> and Luís M.N.B.F. Santos\*<sup>a</sup>

<sup>a</sup> Centro de Investigação em Química, Departamento de Química e Bioquímica, Faculdade de Ciências da  
Universidade do Porto, P-4169-007 Porto, Portugal

<sup>b</sup> REQUIMTE- Departamento de Química e Bioquímica, Faculdade de Ciências, Universidade do Porto,  
Rua do Campo Alegre, P-4169-007, Porto, Portugal

<sup>c</sup> CIAGEB-Faculdade de Ciências da Saúde, Escola Superior de Saúde da UFP, Universidade Fernando  
Pessoa, P-4200-150 Porto, Portugal

<sup>d</sup> Department of Chemistry, University of Aberdeen, Meston Walk, Old Aberdeen, AB24 3UE, Scotland

\* Corresponding author:

Luís M.N.B.F. Santos<sup>a</sup>

Centro de Investigação em Química, Departamento de Química e Bioquímica, Faculdade de Ciências da  
Universidade do Porto, P-4169-007 Porto, Portugal

email: [lbsantos@fc.up.pt](mailto:lbsantos@fc.up.pt)

phone: +351 220402536

fax : +351 220402520

**TABLE S1.** Crystal data, data acquisition conditions and refinement parameters for DBK.

| <b>Dibenzyl ketone</b>                    |                                                                                                                             |
|-------------------------------------------|-----------------------------------------------------------------------------------------------------------------------------|
| empirical formula                         | C <sub>15</sub> H <sub>14</sub> O                                                                                           |
| formula weight                            | $M_r = 210.26 \text{ mol.dm}^{-3}$                                                                                          |
| temp/K                                    | 123 (2) K                                                                                                                   |
| $\lambda/\text{\AA}$                      | 0.71073 \AA                                                                                                                 |
| crystal system                            | Monoclinic, P21/c                                                                                                           |
| cell constants                            | $a = 9.4756(2) \text{ \AA}$ , $b = 5.65970(10) \text{ \AA}$ , $c = 21.2859(3) \text{ \AA}$ ,<br>$\beta = 96.4720(10)^\circ$ |
| volume                                    | $V = 1134.27(4) \text{ \AA}^3$                                                                                              |
| molecules per unit cell, $Z$              | 4                                                                                                                           |
| $D_x$                                     | 1.231 Mg m <sup>-3</sup>                                                                                                    |
| $F(000)$                                  | 244                                                                                                                         |
| crystal size/shape/colour                 | 0.20 × 0.10 × 0.04 mm<br>(Block, yellow)                                                                                    |
| $\theta$ range for data collection        | 3.02–30.62°                                                                                                                 |
| Cell parameters                           | from 6687 reflections                                                                                                       |
| Absorption Coefficient                    | $\mu = 0.075 \text{ mm}^{-1}$                                                                                               |
| Radiation source:                         | fine-focus sealed tube                                                                                                      |
| Monochromator:                            | graphite                                                                                                                    |
| $\theta$ range                            | $\theta_{\min} = 3.1^\circ$ ; $\theta_{\max} = 30.6^\circ$ ; $\omega$ scans                                                 |
| limiting indices                          | $h = -13 \rightarrow 13$ ; $k = -8 \rightarrow 8$ ; $l = -30 \rightarrow 30$                                                |
| reflections collected/unique              | 17359 / 3485; 2653 with $I > 2\sigma(I)$ ; $R_{\text{int}} = 0.033$                                                         |
| Max and Min transmission                  | $T_{\min} = 0.985$ , $T_{\max} = 0.997$                                                                                     |
| data/restraints/parameters                | 3485 / 0 / 145                                                                                                              |
| goodness-off-fit on $F^2$                 | 1.015                                                                                                                       |
| final R indices                           | $R[F^2 > 2\sigma(F^2)] = 0.0432$ ; $wR(F^2) = 0.1067$                                                                       |
| final R indices (all data)                | $R = 0.0630$ ; $wR(F^2) = 0.1189$                                                                                           |
| $\Delta\rho_{\max}$ , $\Delta\rho_{\min}$ | 0.32 e \AA <sup>-3</sup> and -0.20 e \AA <sup>-3</sup>                                                                      |
| refinement method                         | full matrix least-squares on $F^2$                                                                                          |
| CCDC No.                                  | 735344                                                                                                                      |

**TABLE S2.** Experimental results<sup>a</sup> for the combustion of DBK, at  $T = 298.15$  K.

|                                                                                                    | 1        | 2        | 3        | 4        | 5        | 6        | 7        |
|----------------------------------------------------------------------------------------------------|----------|----------|----------|----------|----------|----------|----------|
| $m(\text{cpd.}) / \text{g}$                                                                        | 0.44001  | 0.46285  | 0.34269  | 0.31322  | 0.46354  | 0.26343  | 0.44688  |
| $m'(\text{fuse}) / \text{g}$                                                                       | 0.00249  | 0.00195  | 0.00239  | 0.00264  | 0.00252  | 0.00294  | 0.00259  |
| $T_i / \text{K}$                                                                                   | 298.158  | 298.168  | 298.154  | 298.151  | 298.151  | 298.189  | 298.151  |
| $T_f / \text{K}$                                                                                   | 299.287  | 299.351  | 299.062  | 298.988  | 299.337  | 298.911  | 299.299  |
| $\Delta T_{\text{ad}} / \text{K}$                                                                  | 1.05220  | 1.10611  | 0.82011  | 0.74970  | 1.10906  | 0.63154  | 1.06944  |
| $\varepsilon_i (\text{cont.}) / (\text{J.K}^{-1})$                                                 | 14.92    | 14.95    | 14.80    | 14.77    | 14.95    | 14.71    | 14.93    |
| $\varepsilon_f (\text{cont.}) / (\text{J.K}^{-1})$                                                 | 15.62    | 15.68    | 15.34    | 15.26    | 15.68    | 15.12    | 15.63    |
| $\Delta m(\text{H}_2\text{O}) / \text{g}$                                                          | -0.3     | -0.3     | -0.3     | 0.0      | -1.5     | -0.9     | -1.9     |
| $-\Delta U(\text{IBP})^a / \text{J}$                                                               | 16372.91 | 17211.85 | 12761.24 | 11666.55 | 17252.25 | 9825.34  | 16633.99 |
| $\Delta U(\text{HNO}_3) / \text{J}$                                                                | 0.13     | 0.17     | 0.11     | 0.08     | 0.33     | 0.15     | 0.76     |
| $\Delta U(\text{ignition}) / \text{J}$                                                             | 1.05     | 1.07     | 1.00     | 1.06     | 1.10     | 0.94     | 1.04     |
| $\Delta U_{\Sigma} / \text{J}$                                                                     | 8.72     | 9.22     | 6.64     | 6.03     | 9.24     | 5.01     | 8.88     |
| $-m' \cdot \Delta_{\text{C}} u^{\circ}(\text{fuse}) / \text{J}$                                    | 40.44    | 31.67    | 38.81    | -42.87   | 40.92    | 47.75    | 42.06    |
| $-\Delta_{\text{C}} u^{\circ}(\text{cpd.}) / \text{J} \cdot \text{g}^{-1}$                         | 37096.22 | 37096.04 | 37103.07 | 37087.28 | 37107.50 | 37093.41 | 37104.31 |
| $-\langle \Delta_{\text{C}} u^{\circ} \rangle^b / \text{J} \cdot \text{g}^{-1} = 37098.26 \pm 2.7$ |          |          |          |          |          |          |          |

<sup>a</sup>  $\Delta U(\text{IBP})$  includes  $\Delta U(\text{ignition})$ ;

$m(\text{cpd.})$  is the mass of compound burnt in each experiment;  $m'(\text{fuse})$  is the mass of the fuse (cotton) used in each experiment;  $T_i$  is the initial temperature rise;  $T_f$  is the final temperature rise;  $\varepsilon_i (\text{cont.})$  is the energy equivalent of the contents in the initial state;  $\varepsilon_f (\text{cont.})$  is the energy equivalent of the contents in the final state;  $\Delta m(\text{H}_2\text{O})$  is the deviation of mass of water added to the calorimeter from 2900.0 g;  $\Delta T_{\text{ad}}$  is the corrected temperature rise;  $\Delta U(\text{IBP})$  is the energy change for the isothermal combustion reaction under actual bomb conditions;  $\Delta U(\text{HNO}_3)$  is the energy correction for the nitric acid formation;  $\Delta U(\text{ignition})$  is the electric energy for the ignition;  $\Delta U_{\Sigma}$  is the standard state correction;  $\Delta_{\text{C}} u^{\circ}(\text{fuse})$  is the massic energy of combustion of the fuse (cotton) and  $\Delta_{\text{C}} u^{\circ}$  is the standard massic energy of combustion.

<sup>b</sup> Mean value and given error as the standard deviation of the mean.

**TABLE S3.** Experimental results obtained by Calvet microcalorimetry for the sublimation of DBK.

| $m_{\text{compound}} /$<br>mg                                                                                          | $\Delta_{\text{cr},298.15\text{K}}^{\text{g,T}} H_{\text{m}}^0 /$<br>kJ·mol <sup>-1</sup> | $\langle \Delta_{\text{cr},298.15\text{K}}^{\text{g,T}} H_{\text{m}}^0 \rangle /$<br>kJ·mol <sup>-1</sup> | $k \cdot \langle \Delta_{\text{cr},298.15\text{K}}^{\text{g,T}} H_{\text{m}}^0 \rangle /$<br>kJ·mol <sup>-1</sup> | $H_{\text{m}}^0(\text{g}, T) - H_{\text{m}}^0(\text{g}, 298.15 \text{ K}) /$<br>kJ·mol <sup>-1</sup> |
|------------------------------------------------------------------------------------------------------------------------|-------------------------------------------------------------------------------------------|-----------------------------------------------------------------------------------------------------------|-------------------------------------------------------------------------------------------------------------------|------------------------------------------------------------------------------------------------------|
| 5.26                                                                                                                   | 126.02                                                                                    |                                                                                                           |                                                                                                                   |                                                                                                      |
| 5.66                                                                                                                   | 130.54                                                                                    |                                                                                                           |                                                                                                                   |                                                                                                      |
| 4.61                                                                                                                   | 131.00                                                                                    |                                                                                                           |                                                                                                                   |                                                                                                      |
| 5.61                                                                                                                   | 131.03                                                                                    |                                                                                                           |                                                                                                                   |                                                                                                      |
| 4.80                                                                                                                   | 128.65                                                                                    |                                                                                                           |                                                                                                                   |                                                                                                      |
| 5.12                                                                                                                   | 129.44                                                                                    | 128.7 ± 1.3                                                                                               | 129.8 ± 2.0                                                                                                       | 18.2                                                                                                 |
| 4.91                                                                                                                   | 130.29                                                                                    |                                                                                                           |                                                                                                                   |                                                                                                      |
| 5.34                                                                                                                   | 126.02                                                                                    |                                                                                                           |                                                                                                                   |                                                                                                      |
| 4.87                                                                                                                   | 125.25                                                                                    |                                                                                                           |                                                                                                                   |                                                                                                      |
| 5.62                                                                                                                   | 128.52                                                                                    |                                                                                                           |                                                                                                                   |                                                                                                      |
| $\Delta_{\text{cr}}^{\text{g}} H_{\text{m}}^0 (T = 298.15 \text{ K}) = (111.6 \pm 2.3) \text{ kJ}\cdot\text{mol}^{-1}$ |                                                                                           |                                                                                                           |                                                                                                                   |                                                                                                      |

**TABLE S4.** Experimental results obtained by Calvet microcalorimetry for the vaporization of DBK as a metastable liquid.

| $m_{\text{compound}} /$<br>mg                                                                                        | $\Delta_{\text{cr},298.15\text{K}}^{\text{g,T}} H_{\text{m}}^0 /$<br>kJ·mol <sup>-1</sup> | $\langle \Delta_{\text{cr},298.15\text{K}}^{\text{g,T}} H_{\text{m}}^0 \rangle /$<br>kJ·mol <sup>-1</sup> | $k \cdot \langle \Delta_{\text{cr},298.15\text{K}}^{\text{g,T}} H_{\text{m}}^0 \rangle /$<br>kJ·mol <sup>-1</sup> | $H_{\text{m}}^0(\text{g}, T) - H_{\text{m}}^0(\text{g}, 298.15 \text{ K}) /$<br>kJ·mol <sup>-1</sup> |
|----------------------------------------------------------------------------------------------------------------------|-------------------------------------------------------------------------------------------|-----------------------------------------------------------------------------------------------------------|-------------------------------------------------------------------------------------------------------------------|------------------------------------------------------------------------------------------------------|
| 5.35                                                                                                                 | 98.53                                                                                     |                                                                                                           |                                                                                                                   |                                                                                                      |
| 5.60                                                                                                                 | 98.54                                                                                     |                                                                                                           |                                                                                                                   |                                                                                                      |
| 5.23                                                                                                                 | 103.95                                                                                    |                                                                                                           |                                                                                                                   |                                                                                                      |
| 5.25                                                                                                                 | 101.85                                                                                    | 102.1 ± 1.9                                                                                               | 103.0 ± 2.3                                                                                                       | 18.3                                                                                                 |
| 5.16                                                                                                                 | 104.06                                                                                    |                                                                                                           |                                                                                                                   |                                                                                                      |
| 5.34                                                                                                                 | 102.94                                                                                    |                                                                                                           |                                                                                                                   |                                                                                                      |
| 5.90                                                                                                                 | 104.56                                                                                    |                                                                                                           |                                                                                                                   |                                                                                                      |
| $\Delta_{\text{v}}^{\text{g}} H_{\text{m}}^0 (T = 298.15 \text{ K}) = (84.6 \pm 2.5) \text{ kJ}\cdot\text{mol}^{-1}$ |                                                                                           |                                                                                                           |                                                                                                                   |                                                                                                      |

**TABLE S5.** Calculated energies, in Hartree, for the molecules presented in Scheme 1, at various levels of theory.

|                      | MP2         |             |             | B3LYP         |
|----------------------|-------------|-------------|-------------|---------------|
|                      | cc-pVDZ     | aug-cc-pVDZ | cc-pVTZ     | 6-311++G(d,p) |
| Propanone            | -192.577175 | -192.616081 | -192.774850 | -193.218261   |
| Pentan-3-one         | -270.941221 | -270.992658 | -271.220640 | -271.867665   |
| Benzyl methyl ketone | -422.914157 | -422.988128 | -423.324870 | -424.323351   |
| Benzyl ethyl ketone  | -462.096717 | -462.177073 | -462.548210 | -463.648167   |
| Dibenzyl ketone      | -653.255669 | -653.370329 | -653.880547 | -655.428512   |

**TABLE S6.** Calculated energies, in Hartree, for the PES scan of the benzyl group of DBK (OCCPh dihedral angle), at the MP2/cc-pVDZ level of theory.

| $\Phi$ (OCCPh) | $E_{el}$ / Hartree | $\Delta E_{rel}$ / kJ·mol <sup>-1</sup> |
|----------------|--------------------|-----------------------------------------|
| 0              | -653.249687        | 15.7                                    |
| 20             | -653.250569        | 13.4                                    |
| 40             | -653.251675        | 10.5                                    |
| 60             | -653.253747        | 5.0                                     |
| 70             | -653.254535        | 3.0                                     |
| 80             | -653.255445        | 0.6                                     |
| 90             | -653.255649        | 0.1                                     |
| 92.5           | -653.255588        | 0.2                                     |
| 95             | -653.255489        | 0.5                                     |
| 97.5           | -653.255357        | 0.8                                     |
| 100            | -653.255197        | 1.2                                     |
| 105            | -653.254801        | 2.3                                     |
| 110            | -653.255147        | 1.4                                     |
| 120            | -653.255611        | 0.2                                     |
| <b>125.323</b> | <b>-653.255669</b> | <b>0.0</b>                              |
| 140            | -653.255324        | 0.9                                     |
| 160            | -653.254177        | 3.9                                     |
| 180            | -653.253185        | 6.5                                     |
| 200            | -653.254177        | 3.9                                     |
| 220            | -653.255324        | 0.9                                     |
| <b>234.677</b> | <b>-653.255669</b> | <b>0.0</b>                              |
| 240            | -653.255611        | 0.2                                     |
| 250            | -653.255147        | 1.4                                     |
| 255            | -653.254801        | 2.3                                     |
| 260            | -653.255197        | 1.2                                     |
| 262.5          | -653.255357        | 0.8                                     |
| 265            | -653.255489        | 0.5                                     |
| 267.5          | -653.255588        | 0.2                                     |
| 270            | -653.255649        | 0.1                                     |
| 280            | -653.255445        | 0.6                                     |
| 290            | -653.254535        | 3.0                                     |
| 300            | -653.253747        | 5.0                                     |
| 320            | -653.251675        | 10.5                                    |
| 340            | -653.250569        | 13.4                                    |
| 360            | -653.249687        | 15.7                                    |

**TABLE S7.** Calculated energies, in Hartree, for the PES scan of the benzyl group of BEK (OCCPh dihedral angle), at the MP2/cc-pVDZ level of theory.

| $\Phi$ (OCCPh) | $E_{el}$ / Hartree | $\Delta E_{rel}$ / kJ·mol <sup>-1</sup> |
|----------------|--------------------|-----------------------------------------|
| 0              | -462.093779        | 7.7                                     |
| 5              | -462.093968        | 7.2                                     |
| 10             | -462.094167        | 6.7                                     |
| 20             | -462.094468        | 5.9                                     |
| 25             | -462.094555        | 5.7                                     |
| 35             | -462.094634        | 5.5                                     |
| 40             | -462.094661        | 5.4                                     |
| 50             | -462.094791        | 5.1                                     |
| 55             | -462.094929        | 4.7                                     |
| 65             | -462.095386        | 3.5                                     |
| 70             | -462.095683        | 2.7                                     |
| 80             | -462.096277        | 1.2                                     |
| 90             | -462.096277        | 1.2                                     |
| <b>95.643</b>  | <b>-462.096716</b> | <b>0.0</b>                              |
| 100            | -462.096684        | 0.1                                     |
| 110            | -462.096418        | 0.8                                     |
| 125            | -462.096013        | 1.8                                     |
| 140            | -462.095651        | 2.8                                     |
| 155            | -462.095007        | 4.5                                     |
| 170            | -462.094333        | 6.3                                     |
| 180            | -462.094160        | 6.7                                     |
| 190            | -462.094333        | 6.3                                     |
| 205            | -462.095007        | 4.5                                     |
| 220            | -462.095651        | 2.8                                     |
| 235            | -462.096013        | 1.8                                     |
| 250            | -462.096418        | 0.8                                     |
| 260            | -462.096684        | 0.1                                     |
| <b>264.357</b> | <b>-462.096717</b> | <b>0.0</b>                              |
| 270            | -462.096277        | 1.2                                     |
| 280            | -462.096277        | 1.2                                     |
| 290            | -462.095683        | 2.7                                     |
| 295            | -462.095386        | 3.5                                     |
| 305            | -462.094929        | 4.7                                     |
| 310            | -462.094791        | 5.1                                     |
| 320            | -462.094661        | 5.4                                     |
| 325            | -462.094634        | 5.5                                     |
| 335            | -462.094555        | 5.7                                     |
| 340            | -462.094468        | 5.9                                     |
| 350            | -462.094167        | 6.7                                     |
| 355            | -462.093968        | 7.2                                     |
| 360            | -462.093779        | 7.7                                     |

**TABLE S8.** Calculated energies, in Hartree, for the PES scan of the ethyl group of BEK (OCCCH<sub>3</sub> dihedral angle), at the MP2/cc-pVDZ level of theory.

| $\Phi$ (OCCCH <sub>3</sub> ) | $E_{el}$ / Hartree | $\Delta E_{rel}$ / kJ·mol <sup>-1</sup> |
|------------------------------|--------------------|-----------------------------------------|
| <b>0</b>                     | <b>-462.096717</b> | <b>0.0</b>                              |
| 30                           | -462.095971        | 2.0                                     |
| 60                           | -462.094890        | 4.8                                     |
| 90                           | -462.093756        | 7.8                                     |
| 120                          | -462.093808        | 7.6                                     |
| 150                          | -462.092657        | 10.7                                    |
| 180                          | -462.091525        | 13.6                                    |
| 210                          | -462.093217        | 9.2                                     |
| 240                          | -462.093761        | 7.8                                     |
| 270                          | -462.094026        | 7.1                                     |
| 300                          | -462.093870        | 7.5                                     |
| 330                          | -462.095280        | 3.8                                     |
| <b>360</b>                   | <b>-462.096717</b> | <b>0.0</b>                              |

**TABLE S9.** Peak list of <sup>1</sup>H-NMR signals for dibenzyl ketone at various  $T$ .

| $T$ / K | $\delta_{CH_2}$ / ppm | $\delta_{ortho}$ / ppm | $\delta_{meta}$ / ppm | $\delta_{para}$ / ppm |
|---------|-----------------------|------------------------|-----------------------|-----------------------|
| 192.5   | 3.888                 | 7.188                  | 7.351                 | 7.288                 |
| 201.3   | 3.878                 | 7.186                  | 7.346                 | 7.284                 |
| 211.5   | 3.868                 | 7.184                  | 7.342                 | 7.280                 |
| 221.3   | 3.858                 | 7.181                  | 7.338                 | 7.276                 |
| 230.7   | 3.851                 | 7.178                  | 7.335                 | 7.272                 |
| 241.8   | 3.842                 | 7.175                  | 7.330                 | 7.268                 |
| 252.9   | 3.834                 | 7.172                  | 7.326                 | 7.263                 |
| 264.3   | 3.826                 | 7.168                  | 7.321                 | 7.259                 |
| 275.9   | 3.819                 | 7.165                  | 7.317                 | 7.255                 |
| 290.5   | 3.811                 | 7.161                  | 7.312                 | 7.251                 |
| 301.0   | 3.806                 | 7.159                  | 7.309                 | 7.247                 |
| 307.9   | 3.802                 | 7.157                  | 7.307                 | 7.245                 |
| 314.1   | 3.800                 | 7.156                  | 7.305                 | 7.244                 |
| 321.3   | 3.797                 | 7.155                  | 7.303                 | 7.241                 |
| 327.5   | 3.794                 | 7.153                  | 7.301                 | 7.240                 |
| 331.1   | 3.793                 | 7.153                  | 7.300                 | 7.239                 |

**TABLE S10.** Peak list of <sup>1</sup>H-NMR signals for benzyl ethyl ketone at various  $T$ .

| $T$ / K | $\delta_{CH_2}$ / ppm | $\delta_{CH_2(CH_3)}$ / ppm | $\delta_{CH_3}$ / ppm | $\delta_{ortho}$ / ppm | $\delta_{meta}$ / ppm | $\delta_{para}$ / ppm |
|---------|-----------------------|-----------------------------|-----------------------|------------------------|-----------------------|-----------------------|
| 192.2   | 3.766                 | 2.594                       | 0.966                 | 7.216                  | 7.347                 | 7.279                 |
| 202.0   | 3.762                 | 2.587                       | 0.971                 | 7.218                  | 7.344                 | 7.275                 |
| 215.5   | 3.758                 | 2.578                       | 0.976                 | 7.218                  | 7.340                 | 7.270                 |
| 226.1   | 3.754                 | 2.571                       | 0.978                 | 7.217                  | 7.336                 | 7.266                 |
| 241.8   | 3.750                 | 2.561                       | 0.984                 | 7.217                  | 7.332                 | 7.260                 |
| 252.9   | 3.747                 | 2.554                       | 0.987                 | 7.216                  | 7.329                 | 7.257                 |
| 270.5   | 3.741                 | 2.543                       | 0.991                 | 7.213                  | 7.324                 | 7.252                 |
| 282.6   | 3.738                 | 2.537                       | 0.994                 | 7.212                  | 7.321                 | 7.248                 |
| 292.1   | 3.735                 | 2.532                       | 0.997                 | 7.210                  | 7.318                 | 7.246                 |
| 301.6   | 3.733                 | 2.527                       | 0.999                 | 7.209                  | 7.316                 | 7.262                 |
| 314.6   | 3.730                 | 2.522                       | 1.001                 | 7.207                  | 7.313                 | 7.259                 |
| 315.6   | 3.729                 | 2.520                       | 1.001                 | 7.207                  | 7.312                 | 7.258                 |
| 328.3   | 3.727                 | 2.516                       | 1.004                 | 7.206                  | 7.311                 | 7.256                 |

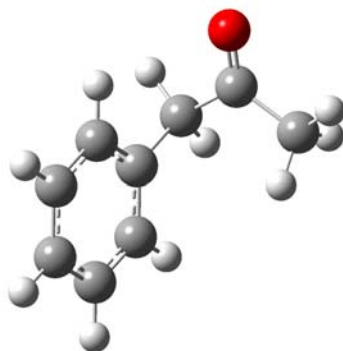

**Figure S1.** Optimized geometry of benzyl methyl ketone (BMK) at the MP2/cc-pVDZ.

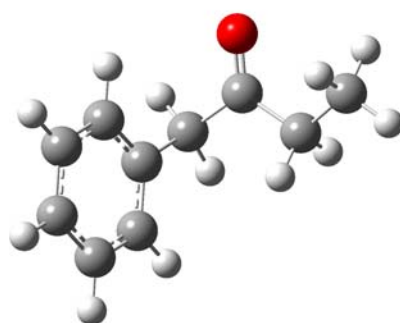

**Figure S2.** Optimized geometry of benzyl ethyl ketone (BEK) at the MP2/cc-pVDZ.

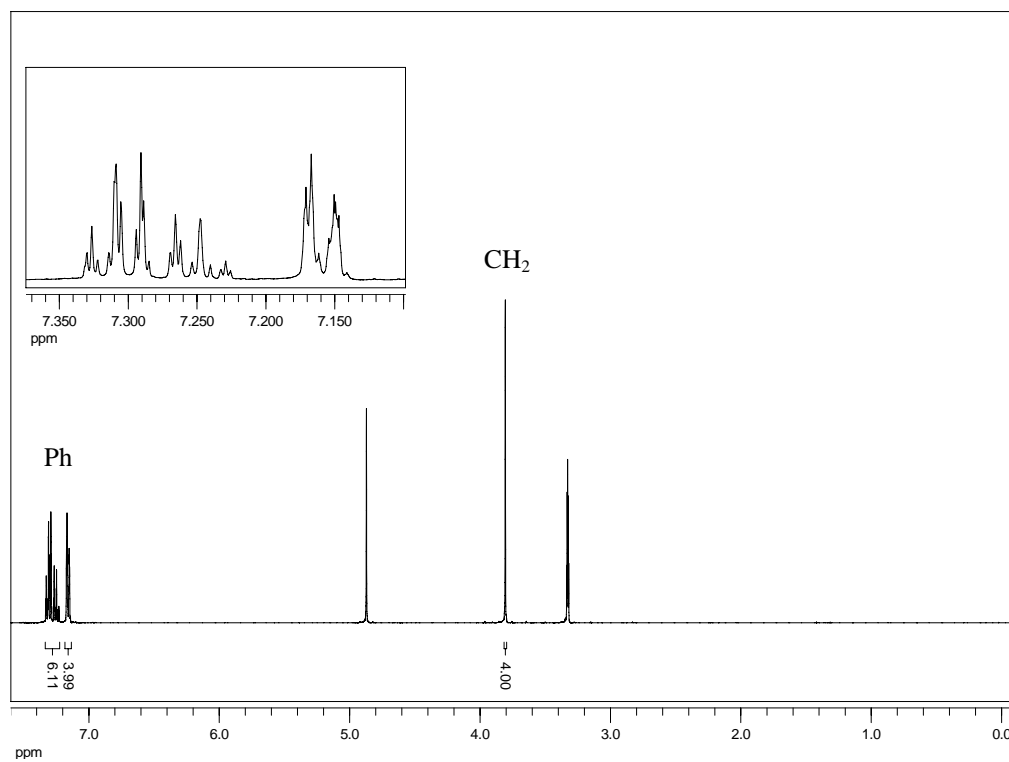

**Figure S3.**  $^1\text{H}$ -NMR spectrum of DBK in  $\text{MeOD-}d_4$  at 298 K.



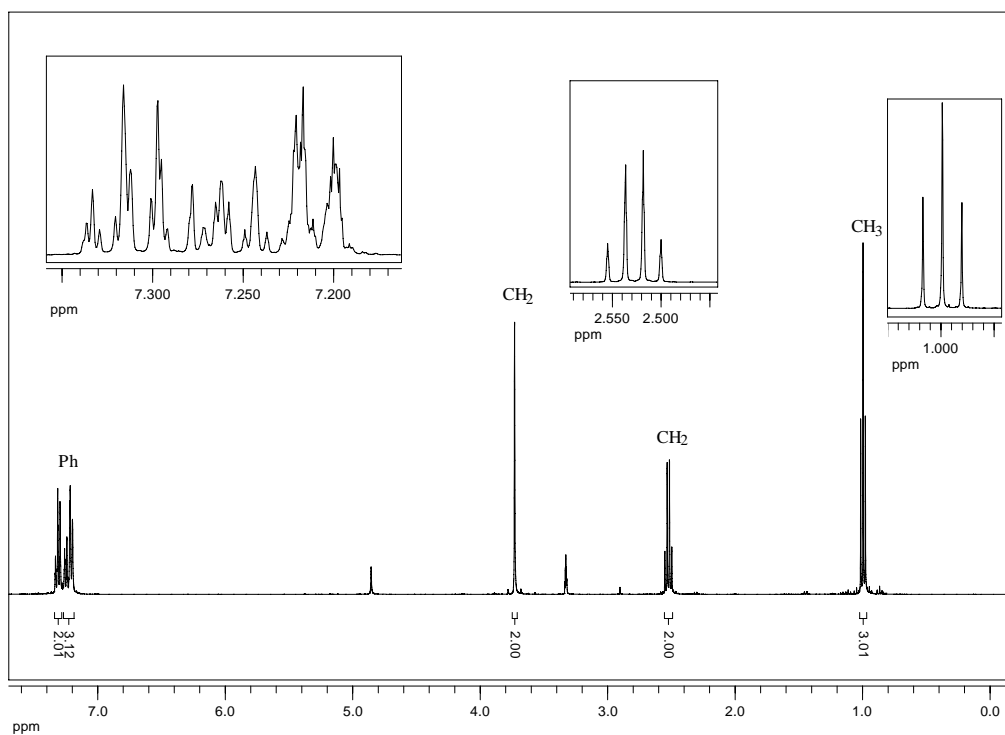

**Figure S4.**  $^1\text{H-NMR}$  spectrum of BEK in  $\text{MeOD-}d_4$  at 298 K.
